# Supplementary material for: A critical bioenergetic switch is regulated by IGF2 during murine cartilage development
Source: PubMed Central journal article supplement (PMC9652369; doi:10.1038/s42003-022-04156-4), 2022-11-11
Supplement: 42003_2022_4156_MOESM2_ESM.pdf [file 42003_2022_4156_MOESM2_ESM.pdf]

## Description of Additional Supplementary Files

**File name:** Supplementary Data 1

**Description:** Source data for graphs.
